# Supplementary material for: Single-Dose Immunization With a Chimpanzee Adenovirus-Based Vaccine Induces Sustained and Protective Immunity Against SARS-CoV-2 Infection
Source: Front Immunol. 2021 Jun 28;12:697074. doi: 10.3389/fimmu.2021.697074 (PMC8273614; doi:10.3389/fimmu.2021.697074)
Supplement: Supplementary file 1 [file Table_1.xlsx]

## Sheet: Sheet1
Supplementary Table 1. Primers for the construction of pAdC68-19S, pAdC68-19RBD, and pAdC68-19RBDs.
Primer Name	Primer Sequence from 5' to 3'
19S-F	gctagcgtttaaacgggcccGCCCGGGCTTATAAgccaccATGTTCCTGCTGACCACC
19S-R	agcggtttaaacttaagcttGCCCGGGCTTATAACTAGGTGTAGTGCAGCTTCA
19RBD-F	gctagcgtttaaacgggcccGCCCGGGCTTATAAgccaccATGTTCGTGTTCCTGGTGCT
19RBD-R	agcggtttaaacttaagcttGCCCGGGCTTATAACTAGAAATTCACGCACTTAT
19RBDs-F	gctagcgtttaaacgggcccGCCCGGGCTTATAAgccaccATGGGATGGTCATGTATC
19RBDs-R	agcggtttaaacttaagcttGCCCGGGCTTATAACTAGAAATTCACGCACTTAT
